## Review Article

# SUMOylation and calcium signalling: potential roles in the brain and beyond

Leticia Coelho-Silva<sup>1</sup>, Gary J. Stephens<sup>2</sup> and Helena Cimarosti<sup>1</sup><sup>1</sup>Department of Pharmacology, Federal University of Santa Catarina, Florianopolis, Brazil; <sup>2</sup>School of Pharmacy, University of Reading, Reading, U.K.**Correspondence:** Helena Cimarosti (helena.cimarosti@ufsc.br)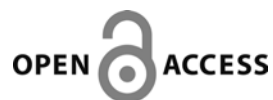

Small ubiquitin-like modifier (SUMO) conjugation (or SUMOylation) is a post-translational protein modification implicated in alterations to protein expression, localization and function. Despite a number of nuclear roles for SUMO being well characterized, this process has only started to be explored in relation to membrane proteins, such as ion channels. Calcium ion ( $\text{Ca}^{2+}$ ) signalling is crucial for the normal functioning of cells and is also involved in the pathophysiological mechanisms underlying relevant neurological and cardiovascular diseases. Intracellular  $\text{Ca}^{2+}$  levels are tightly regulated; at rest, most  $\text{Ca}^{2+}$  is retained in organelles, such as the sarcoplasmic reticulum, or in the extracellular space, whereas depolarization triggers a series of events leading to  $\text{Ca}^{2+}$  entry, followed by extrusion and reuptake. The mechanisms that maintain  $\text{Ca}^{2+}$  homeostasis are candidates for modulation at the post-translational level. Here, we review the effects of protein SUMOylation, including  $\text{Ca}^{2+}$  channels, their proteome and other proteins associated with  $\text{Ca}^{2+}$  signalling, on vital cellular functions, such as neurotransmission within the central nervous system (CNS) and in additional systems, most prominently here, in the cardiac system.

## Introduction

The small ubiquitin-like modifier (SUMO) was first described as targeting nuclear proteins that regulate transcription factors, gene expression and DNA integrity [1]. Experiments with knockout mice for the sole SUMO conjugating enzyme, ubiquitin-like conjugating enzyme 9 (Ubc9), demonstrated nuclear dysfunction and embryonic lethality, confirming that SUMOylation is physiologically indispensable [2]. Reports that are more recent have shown that SUMO can also target cytosolic and membrane proteins, including ion channels, to regulate crucial cellular functions, such as plasma membrane depolarization and neurotransmission [3,4]. So far, the majority of studies have focused on SUMOylation of potassium ( $\text{K}^+$ ) channels, which are involved in setting the duration and firing pattern of action potentials [5]. For example, SUMOylation can modulate both two-pore domain  $\text{K}^+$  (K2P) channels [3,6-9], responsible for the regulation of background leak currents, and voltage-dependent  $\text{K}^+$  ( $\text{K}_v$ ) channels [10-13] that repolarize cell membrane during action potential input. However, there is also recent evidence that voltage-gated  $\text{Ca}^{2+}$  channels (VGCCs) [14] and transient receptor potential (TRP) channels [15], both of which can mediate  $\text{Ca}^{2+}$  influx, are SUMO targets. Considering the utmost relevance of  $\text{Ca}^{2+}$  in physiological and pathophysiological processes, and the growing evidence that SUMO can modify ion channels, our review focused on the potential roles of SUMOylation of  $\text{Ca}^{2+}$  channels and proteins related with  $\text{Ca}^{2+}$  signalling with a focus on the central nervous system (CNS) and, also, the cardiac system.

## SUMOylation pathways

Post-translational modifications of proteins can affect their function, localization and degradation depending on the stimulus applied, to control cellular response [16,17]. SUMOylation is a reversible lysine-targeted post-translational modification, whereby covalently conjugated SUMO regulates proteins in numerous pathways [18,19]. Currently, there are five proposed SUMO isoforms, with SUMO-1, 2

Received: 25 April 2017  
Revised: 10 July 2017  
Accepted: 11 July 2017Accepted Manuscript Online:  
12 July 2017  
Version of Record published:  
19 July 2017

and 3 being the best-characterized paralogs. SUMO-1 shares approximately 50% of its amino acid sequence with both SUMO-2 and SUMO-3, which are typically known as SUMO-2/3 since they differ by only three N-terminal amino acids and antibodies are usually unable to distinguish between them [20,21]. Despite the similarities, there are functional differences between SUMO-1 and SUMO-2/3. For instance, under basal conditions, unconjugated SUMO-1 is scarce, but free SUMO-2/3 is widely expressed in mammalian cells [22]. Although the exact role for SUMO-4 remains uncertain, it has been associated with the pathophysiological mechanisms underlying diabetes [23,24]. Finally, the existence of a fifth SUMO isoform, SUMO-5, that regulates promyelocytic leukaemia nuclear bodies, has recently been suggested [25]. The same enzymes conjugate all SUMO isoforms [19].

The first step in the SUMOylation process requires the maturation of SUMO by SUMO-specific isopeptidases/proteases; next, SUMO is activated in an ATP-dependent step by E1 complex, which in humans consists of an heterodimer formed by SUMO-activating enzyme subunits 1 and 2 (SAE1 and SAE2 respectively). Subsequently, SUMO is transferred from the E1 activating enzyme to the E2 conjugating enzyme, also known as Ubc9, which is able to conjugate SUMO to target proteins both in E3 ligase-dependent and -independent manners. Most target proteins carry the same consensus motif that is directly recognized by Ubc9: the  $-K-x-D/E$  sequence, with representing a large hydrophobic residue (commonly isoleucine, leucine or valine), K is the modified lysine, x is any residue and D/E are acidic residues [22,26]. Nevertheless, non-covalent interactions between SUMO and target proteins can occur through SUMO interacting motifs (SIMs) [17,27]. These SIMs consist of a short stretch of branched hydrophobic residues, typically comprising isoleucine (I) or valine (V) residues organized as (V/I)-x-(V/I)-(V/I) or (V/I)-(V/I)-x-(V/I), flanked  $NH_2-$  or  $COOH-$  terminally by serine residues and/or acidic residues [28]. Alternatively, SUMO E3 ligases can directly bind to target proteins [17]. The SUMOylation process is highly reversible by the same enzymes responsible for SUMO maturation and also SUMO deconjugation from substrate proteins [29].

Recently, three distinct families of SUMO-specific isopeptidases and proteases have been identified in mammals: the ubiquitin-like protease/sentrin-specific protease (Ulp/SENPs), the deSUMOylating isopeptidase (Desi) and ubiquitin-specific peptidase-like protein 1 (USPL1) [30,31]. The SENPs are the best characterized and, so far, six SENP isoforms have been identified in humans: SENP1, 2, 3, 5, 6 and 7 [17]. SENP1 is highly expressed in the nucleus, in the nuclear pore and as discrete nuclear 'dots' [32], but can also be found in all neuronal processes and at synapses at lower levels [33-35]. During the maturation phase, SENP1 cleaves pro-SUMO preferentially to generate SUMO-1 and SUMO-2/3 [36,37], while it deconjugates both SUMO isoforms [37,38]. SENP2 is similar to SENP1 with respect to its localization and characteristics regarding the maturation step, but differs from SENP1 regarding its highly selectivity for SUMO-2/3 deconjugation [37-40]. SENP3 is found in the nucleus, but also in the mitochondria and participates in neuronal signalling [41]. The role of SENP3 in cleaving pro-SUMO has not been elucidated as yet, but it is suggested that SENP3 is somehow selective for removing SUMO-2/3 from target proteins [37,38]. As for SENP3, SENP5 has a nuclear localization [37,42] and is important for SUMO-2/3 maturation and deconjugation [37,38,43]. Finally, SENP6 and SENP7 are located throughout the nucleoplasm [17,44] and, although neither participates in the maturation step, they are both important for removal of SUMO-2/3 [17,44,45]. Regarding the Desi family, two isoforms have been identified so far: Desi-1 and Desi-2. Whereas Desi-1 is found both in the cytoplasm and the nucleus, where it promotes deconjugation of all SUMO isoforms, Desi-2 is exclusively cytoplasmatic and its properties remain undefined [30,31]. Lastly, USPL1 preferably promotes SUMO-2/3 deconjugation and is located in Cajal bodies [30,31].

## Roles of SUMOylation in neurological diseases

Disruption of basal SUMOylation has been implicated in multiple neurological disorders, including neurodegenerative diseases, such as Alzheimer and Parkinson's diseases (AD and PD respectively), spinocerebellar ataxias (SCAs), cerebral ischaemia and epilepsy [46]. More specifically, amyloid precursor protein (APP) and tau, which are key proteins in AD, have been identified as SUMO targets in HeLa and HEK293 cells [47-49]. APP undergoes proteolytic cleavage by  $\alpha$ - or  $\beta$ -secretases, and both are followed by further  $\gamma$ -secretase processing [50]. While  $\alpha$ -secretases cleave APP to peptides that are proposed to participate in neuroprotection and neuroplasticity, characterizing the non-amyloidogenic pathway [51], cleavage by  $\beta$ -secretases leads to the amyloidogenic pathway, generating toxic amyloid  $\beta$  ( $A\beta$ ) that accumulates and forms amyloid plaques [52]. A reduction in  $A\beta$  aggregates was found in HeLa cells when APP was SUMOylated by either SUMO-1 or SUMO-2 at lysines 587 and 595, which are located adjacently to the  $\beta$ -secretase site [48]. Moreover, poly-SUMOylation of APP by SUMO-3 has been reported to regulate APP cleavage and decrease  $A\beta$  production in HEK293 cells [53]. Conversely, SUMO-3, as well as SUMO-1, was found to increase  $\gamma$ -secretase levels [54], thus increasing  $A\beta$  production in a transgenic mice model for AD [55]. It is important to note

that SUMO-3 effects on A $\beta$  deposition might not be dependent on the ability of SUMO-3 to conjugate to target proteins [54]. Another AD hallmark is the hyperphosphorylation of tau [56] that decreases its affinity for microtubules, resulting in tau accumulation and formation of neurofibrillary tangles [57]. Tau can undergo SUMOylation at lysine 340 in HEK293 cells, which triggered its phosphorylation and inhibited its degradation by the ubiquitin–proteasome pathway, thus increasing tau aggregation [47].

As for mouse models of AD [55], increased levels of SUMO-1 were found in the plasma of patients with dementia [58]. Conversely, SUMO-1 conjugates were not altered in the post-mortem hippocampus of AD patients, whereas SUMO-2/3 high molecular weight conjugates were decreased [59]. These observations are in agreement with previous reports that found increased SUMO-1 and decreased SUMO-2 conjugation levels in the cortex and hippocampus respectively, of Tg2576 mice [60,61]. However, a recent study demonstrated absence of gross changes in global SUMOylation levels in the post-mortem cortex of AD patients [62].

$\alpha$ -Synuclein, parkin and DJ-1 are examples of SUMO targets relevant to PD [17,63,64]. Cytosolic inclusions known as Lewy bodies, comprised mostly by aggregated  $\alpha$ -synuclein, contribute to the synaptic dysfunction and consequent dopaminergic neuronal death predominantly in the substantia nigra, a well-described characteristic of PD [65–68]. Promisingly, SUMO-1 conjugation to  $\alpha$ -synuclein reduced its aggregation and toxicity in a transgenic mice model for PD [69]. Interestingly, in an early communication, lysosomal SUMO-1 labelling was identified in human olfactory mucosa-neurospheres obtained from biopsies of patients with idiopathic PD [70]. A similar finding was observed in post-mortem tissue from patients with multiple system atrophy and progressive supranuclear palsy, diseases in which  $\alpha$ -synuclein and tau seem to be involved [70,71]. In both familial and sporadic PD, parkin, which is an ubiquitin ligase, can be found together with  $\alpha$ -synuclein in Lewy bodies, where SUMO-1 was shown to non-covalently and selectively interact with parkin, increasing its auto-ubiquitination and transportation to the nucleus [72]. Moreover, SUMOylation of DJ-1, a transcriptional regulator mutated in 1–2% of early-onset PD cases, maintained its cytoprotective function in response to oxidative stress [73,74], whereas incomplete SUMOylation of DJ-1 led to its proteasomal degradation [75]. In a similar way to SUMOylated  $\alpha$ -synuclein, increased SUMO conjugation to ataxin-7 decreased its aggregation and cytotoxicity in SCAs [76].

Despite several reports from our group and others showing that SUMOylation can protect cells from metabolic stress caused by low levels of oxygen and glucose in different models of cerebral ischaemia and hypoxic conditions [77–81], disease-modified SUMO targets remain largely unknown. However, one such target is the mitochondrial GTPase dynamin-related protein 1 (Drp1), which regulates mitochondrial fission [41,82]. Under stress conditions, Drp1-mediated mitochondrial fission can release cytochrome *c* and induce caspase cleavage followed by cell apoptosis [83]. In an *in vitro* model of ischaemia, oxygen and glucose deprivation led to SENP3 degradation and consequent increase in SUMO-2/3 conjugation to Drp1, thus preventing mitochondrial fission and cytochrome *c* release, as well as promoting cell survival [41]. Another ischaemia-modified SUMO target is the isoform 3 of the sodium (Na<sup>+</sup>)/Ca<sup>2+</sup> exchanger (NCX), which controls ionic homeostasis during cerebral ischaemia [84]. NCX3 f-loop lysine 590 is required for SUMOylation, and the absence of this residue increased NCX3 degradation, exacerbating ischaemic damage induced by permanent and transient middle cerebral artery occlusion (MCAO) [85]. Following preconditioning and transient MCAO, SUMO-1 basal expression led to increased NCX3 levels, whereas SUMO silencing decreased NCX3 levels, suggesting that NCX3 SUMOylation participates in the protective role that SUMO-1 plays during ischaemic preconditioning [85].

Evidence shows that SUMOylation may be involved in mechanisms implicated in the development and maintenance of epilepsy, since it was demonstrated that neuronal K<sup>+</sup> channels could be SUMOylated, thus modulating neuronal excitability [3,6–10]. Moreover, SUMOylation of excitatory receptor subunits can modulate receptor trafficking and interfere with synaptic transmission [86–90]. For example, SUMOylation of the GluK2 subunit of kainate receptors led to receptor internalization, which could be neuroprotective against excitotoxicity [33]. More recently, the major cause of premature death in epilepsy, known as sudden unexplained death in epilepsy, has been linked with the hyper-SUMOylation of the K<sub>V</sub>7 K<sup>+</sup> channel, which functionally reduces the depolarizing M-current conducted by this channel [13].

## Ca<sup>2+</sup> channels

Unique amongst other ions, Ca<sup>2+</sup> can modulate both membrane potential and function as an important signalling entity. Several cellular processes, ranging from neurotransmitter/hormone release [91] and muscle contraction [92] to gene transcription [93,94], require an increase in the intracellular Ca<sup>2+</sup> levels, which under basal conditions are maintained approximately 100 nM [95]. This temporary increase occurs by either release from intracellular Ca<sup>2+</sup>

stores or influx into the cell by agonist-operated channels, G-protein coupled receptors, store-operated channels and, predominantly, through VGCCs located at the plasma membrane [96].

VGCCs were initially classified based on their voltage-dependent activation (high or low voltage-activated channels) [97,98] and subsequently subdivided by pharmacological and biophysical function (high voltage-activated and low voltage-activated) [99] and then by  $\text{Ca}_V\alpha 1$  subunits [100].  $\text{Ca}_V\alpha 1$  structure allows selectivity for  $\text{Ca}^{2+}$  over monovalent ions and contains a sensor motif that detects membrane depolarization leading to channel opening [96]. Based on their  $\text{Ca}_V\alpha 1$  subunits, three families of VGCCs have been defined:  $\text{Ca}_V 1$  – present mainly in skeletal muscle, heart, neurons and endocrine cells,  $\text{Ca}_V 2$  – found mainly at presynaptic terminals in the CNS, but also in peripheral synapses, and  $\text{Ca}_V 3$  – localized mainly in the sinoatrial node, adrenal glomerulosa cells, neurons and sperm acrosome [100,101].  $\text{Ca}_V 1$  subunits form L-type  $\text{Ca}^{2+}$  current;  $\text{Ca}_V 2.1$  forms P/Q-type,  $\text{Ca}_V 2.2$  N-type and  $\text{Ca}_V 2.3$  form R-type current, whereas  $\text{Ca}_V 3$  subunits form T-type current. In addition to the three  $\text{Ca}_V\alpha 1$  family subunits ( $\text{Ca}_V 1$ ,  $\text{Ca}_V 2$  and  $\text{Ca}_V 3$ ), there are auxiliary  $\beta$ ,  $\alpha 2$ ,  $\delta$  and also  $\gamma$  subunits that comprise the channel complex and have various functions including transporting channels from the endoplasmic reticulum to the plasma membrane, maintaining channel stability and contributing to physiological and pharmacological properties [100].

## Roles of $\text{Ca}^{2+}$ channels in neurological disorders

Pathological changes in  $\text{Ca}^{2+}$  homeostasis and deregulation of  $\text{Ca}^{2+}$  channels are implicated in a range of neurological disorders, including epilepsy, cerebral ischaemia, pain, neurodegenerative, and psychiatric diseases [102–104].  $\text{Ca}^{2+}$  levels control neuronal hyperexcitability and mutations in VGCCs have been identified in familial CNS diseases (so-called ‘channelopathies’). For example,  $\text{Ca}_V 2.1$  and  $\text{Ca}_V 3.2$  channelopathies have been widely associated with forms of absence epilepsy and episodic ataxia [105]. Furthermore, acquired epilepsy and cerebral ischaemia can occur due to insults resulting from increased  $\text{Ca}^{2+}$  influx [105,106]. Moreover, exocytosis of synaptic vesicles mediated by VGCCs, whereby membrane depolarization triggered by action potentials causes transmitter release, may be targeted in pain pathways, in particular at central terminals of sensory nociceptive afferents. For example, both  $\text{Ca}_V 2.2$  and  $\text{Ca}_V 3.2$  channels are crucial for control of neurotransmitter release at the dorsal horn [107,108].  $\text{Ca}_V 2.2$  is targeted therapeutically by ziconotide [109,110], a drug used to treat cancer-derived pain, and other drugs targeting  $\text{Ca}_V 2.2$  are in development [96].  $\text{Ca}_V 3.2$  also acts to regulate afferent fibre excitability [111] and there is good evidence that these channels are up-regulated under chronic pain conditions [112–115].

Neurodegenerative diseases and psychiatric disorders have been related to  $\text{Ca}^{2+}$  handling often with respect to mitochondrial function, since rises in  $\text{Ca}^{2+}$  levels lead to mitochondrial stress and generation of reactive oxygen species [96]. In AD, deregulation of  $\text{Ca}^{2+}$  homeostasis contributes to  $\text{A}\beta$  production and accumulated  $\text{A}\beta$  interferes with  $\text{Ca}^{2+}$  influx. Under physiological conditions,  $\text{Ca}^{2+}$  entry is reported to contribute to APP cleavage by  $\alpha$ -secretase, while improper intracellular  $\text{Ca}^{2+}$  mobilization can affect APP processing and lead to increased  $\text{A}\beta$  levels, neuroinflammation and metabolic stress [115,116].  $\text{A}\beta$  is proposed to modulate  $\text{Ca}^{2+}$  influx in various ways including: by direct effects of oligomeric  $\text{A}\beta$  on the  $\text{Ca}_V\alpha 1$  subunit [117,118], inducing membrane-associated oxidative stress or contributing to excitotoxicity [116,119]. Moreover, mutations in  $\text{Ca}_V 1.2$  and  $\text{Ca}_V\beta 2$  have been linked to both bipolar disorder and schizophrenia, while mutations in  $\text{Ca}_V 1.3$  have also been linked to bipolar disorder [96]. In addition,  $\text{Ca}_V 1.3$  contributed to neuronal loss in PD as a consequence of inherent voltage-dependent activation of the subunit, rather than their selectivity for  $\text{Ca}^{2+}$  [120]. Moreover,  $\alpha$ -synuclein aggregation can modulate the influx of  $\text{Ca}^{2+}$ , and, in turn, increases in  $\text{Ca}^{2+}$  concentration can promote  $\alpha$ -synuclein aggregation [121,122].

## SUMOylation and $\text{Ca}^{2+}$ signalling in neurotransmission

SUMOylation of proteins involved in  $\text{Ca}^{2+}$  signalling affects the maintenance of neurotransmission from synapse formation (Figure 1A) to neurotransmitter release (Figure 1B) and synaptic plasticity. Mutations in the *CACNA1A* gene, which encodes the  $\text{Ca}_V 2.1$  subunit, are found in SCA type 6 (SCA6) and lead to impaired VGCC function [123]. In an early communication, SUMO-1 overexpression was reported to decrease wild-type  $\text{Ca}_V 2.1$  current density in HEK293 cells, whereas it had no effects on SCA6  $\text{Ca}_V 2.1$  mutants [124]. Interestingly, either SUMO-1 overexpression or *SEN1* silencing enhanced cAMP-dependent exocytosis and glucagon secretion from both mouse and human pancreatic  $\alpha$ -cells via effects on  $\text{Ca}_V 1$  channels [14].

Increased SUMO-1 conjugation to presynaptic target proteins was shown to regulate  $\text{Ca}^{2+}$  influx and neurotransmitter release in synaptosomes [125]. Depending on the applied stimulus, SUMOylation of presynaptic proteins could either increase or decrease neurotransmitter release. For example, loading synaptosomes with SUMO-1 and *SEN1* peptides decreased and increased  $\text{Ca}^{2+}$  influx and KCl-evoked glutamate release respectively. Conversely, kainate-induced  $\text{Ca}^{2+}$  influx and neurotransmitter release were increased in synaptosomes loaded with SUMO-1 and

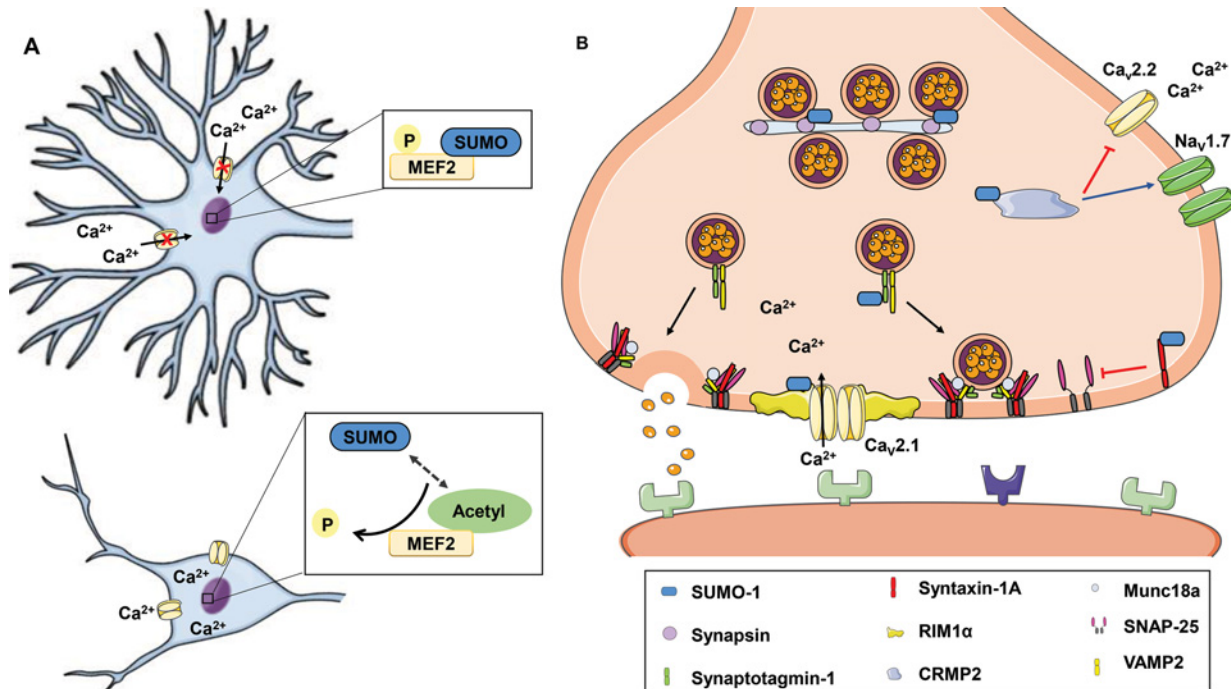

**Figure 1. Potential roles played by SUMO on  $Ca^{2+}$  signalling in neurotransmission**

(A) Decreased calcium signalling leads to phosphorylation and SUMOylation of MEF2A, thus promoting synapse formation. As a result of VGCC activation, MEF2 is dephosphorylated and switches SUMOylation to acetylation inhibiting synaptic processes. (B) SUMOylated RIM1 $\alpha$  facilitates the clustering of  $Ca_v2.1$   $Ca^{2+}$  channels and enhances  $Ca^{2+}$  influx necessary for vesicular release. When SUMO is conjugated to CRMP2, it inhibits  $Ca^{2+}$  entry through  $Ca_v2.2$  channels, and increases surface expression of  $Na_v1.7$  channels. SUMOylation of syntaxin-1A, synaptotagmin-1 and synapsin Ia can regulate neurotransmission by participating in docking/priming of synaptic vesicles; CRMP2, collapsin response mediator protein 2; MEF2, myocyte enhancer factor 2.

decreased in synaptosomes loaded with SENP1 [125]. These results suggest that SUMO may be conjugated to distinct presynaptic proteins and act in an activity-dependent and stimulus-specific manner to modulate presynaptic release.

Crucial proteins in neurotransmitter release, CRMP2 and Rab3a-interacting molecule (RIM) have been identified as members of the  $Ca_v2$  proteome [126]. SUMOylation of VGCC interacting proteins has been reported to play an important role in neurotransmission within pain pathways. CRMP2 interacts with  $Ca_v2.2$  subunits in sensory neurons or nociceptors to modulate neurotransmitter release [127]. SUMO-1–3 modified CRMP2 at lysine 374 in cultured catecholamine A differentiated cells [128]. Overexpression of SUMO, Ubc9 and CRMP2 in adult dorsal root ganglion neurons decreased, whereas overexpression of non-SUMOylatable CRMP2 increased, KCl depolarization-induced  $Ca^{2+}$  entry. In addition, CRMP2 SUMOylation increased surface expression of  $Na_v1.7$  channels [129]. Mutations in  $Na_v1.7$  channels, which are highly expressed in peripheral sensory neurons, where they are responsible for regulating neuronal excitability, are directly related with pain disorders [130].

RIM1 $\alpha$  interacts either directly or indirectly with most presynaptic active zone proteins and participates in the docking and priming of synaptic vesicles [131] by modulating  $Ca^{2+}$  influx through regulation of VGCCs clustering [132,133]. SUMO-1 conjugation to RIM1 $\alpha$  at lysine 502 was shown to be crucial for normal presynaptic exocytosis in neurons [133]. Knockdown of endogenous RIM1 $\alpha$ , and its replacement with a non-SUMOylatable mutant, led to impairment of  $Ca^{2+}$ -induced depolarization and consequent removal of the fast component of vesicle exocytosis. SUMOylated RIM1 $\alpha$  facilitated the clustering of  $Ca_v2.1$  channels and enhanced  $Ca^{2+}$  influx necessary for vesicular release, whereas de-SUMOylated RIM1 $\alpha$  participated in the docking/priming of synaptic vesicles and structural maintenance of the active zone [133].

Presynaptic soluble *N*-ethylmaleimide sensitive factor attachment protein receptors (SNARE) proteins, such as syntaxin 1, are fundamental for neurotransmitter release [134] and might also participate in vesicle endocytosis [135,136]. Syntaxin 1A can be modified by SUMO-1 at any of three lysine residues (K252, K253 or K256) near the C-terminal transmembrane domain [137]. Preventing syntaxin 1A SUMOylation reduced its interaction with other SNARE proteins and disrupted the balance of synaptic vesicle endo/exocytosis, resulting in increased endocytosis. Another key

protein that is SUMOylated is synapsin Ia: preventing SUMO-1 conjugation to synapsin Ia at lysine 687 caused impaired exocytosis due to a reduction in the number of releasable synaptic vesicles [138]. Proteomic analysis from a neuron-specific SUMO-1 overexpressing transgenic mouse model led to the identification of a number of previously unrecognized SUMO-1 targets *in vivo*, including the Ca<sup>2+</sup> sensor synaptotagmin-1 [139]. Increased SUMO-1 conjugation to synaptotagmin-1 resulted in impaired paired-pulse facilitation (PPF), which involves the facilitation of neurotransmitter release caused by residual Ca<sup>2+</sup> from a previous stimulus.

Homologs of the SUMOylation machinery were identified in *Drosophila*, and an interaction with Ca<sup>2+</sup>/calmodulin-dependent protein kinase II (CaMKII) that modulates synaptic plasticity by regulating glutamatergic synapses [140] was demonstrated by yeast two-hybrid screening [141]. *Drosophila* SUMO-1 (DmSUMO-1) modification has potential to change the subcellular localization of CaMKII, but the functional consequences for this interaction remain to be confirmed.

Dendritic claws in cerebellar granular neurons, in which mossy fibre terminals and Golgi neurons form synapses [142], are regulated by the myocyte enhancer factor 2A (MEF2A). MEF2A transcription factor activity is regulated by several post-translational protein modifications, including phosphorylation [143-145], ubiquitination [146] and SUMOylation [147]. Lack of Ca<sup>2+</sup> signalling led to phosphorylation of MEF2A at serine 408, which in turn led to SUMO-1 conjugation at lysine 403 and inactivation of MEF2A, promoting dendritic claw differentiation, synapse formation and maturation. Activity-dependent Ca<sup>2+</sup> signalling via Ca<sub>v</sub>1 VGCCs induced calcineurin-mediated dephosphorylation of MEF2A at serine 408, promoting a switch from SUMOylation to acetylation at lysine 403, which in turn activated MEF2A and inhibited dendritic claw differentiation and synapse formation [147].

As previously described, deregulation of Ca<sup>2+</sup> homeostasis contributes to aggregation of proteins such as A $\beta$  and  $\alpha$ -synuclein, known as aggregation-prone proteins, which can interfere with neurotransmission. Also, production and accumulation of these proteins interfere with Ca<sup>2+</sup> influx [148]. Two lysines of APP can be modified by SUMO *in vivo* leading to decreased levels of A $\beta$  aggregates [48]. SUMOylation of  $\alpha$ -synuclein seems to inhibit  $\alpha$ -synuclein aggregation and toxicity both *in vitro* and *in vivo* [149]. This inhibition depends on the SUMO isoform (SUMO-1 conjugation is better than SUMO-3) and on the SUMOylated lysine (K102 is better than K96) [150]. Interestingly, raised concentrations of monomeric  $\alpha$ -synuclein in the extracellular medium promoted dopamine release in the striatum via Ca<sub>v</sub>2.2 channels *in vivo* and *in vitro*, modifying plasma membrane structure and altering raft partitioning of this channel, suggesting the early reorganization of synaptic terminals as the mechanism to sensitizing dopaminergic neurons [151]. Paradoxically, SUMOylation of  $\alpha$ -synuclein promoted its aggregation in COS-7 cells and had an intriguing protective effect [152].

## Roles of SUMOylation outside the brain and effects of SUMO on other channels

Other than the brain, SUMOylation is well characterized in the heart. Both Ubc9 inhibition and SUMO-2 knockout caused early embryonic lethality in mice [2,153], whereas SUMO-1 knockout led to specific cardiac septal defects [154]. Activating the SUMOylation pathway can also evoke cardiac abnormalities, such as cardiac specific SUMO-2 overexpression that induced premature death and severe cardiomyopathy [155]. Conversely, SUMO-1 overexpression improved heart failure [154-156], suggesting that tightly regulated SUMOylation levels are essential for normal cardiac development [154,157].

SUMOylation also influences cardiac metabolism, controlling crucial proteins for the maintenance of cardiac energy homeostasis and mitochondrial biogenesis, such as peroxisome proliferator-activated receptor (PPAR) and its associated co-regulators [158]. Similarly, under metabolic stress conditions, increased cellular SUMOylation (mainly by SUMO-2/3) can protect the brain during ischaemia or hibernation torpor [158-160]. Both in animal models and human patients, a fine balance between SUMO conjugation/deconjugation is critical for cardiac stress adaptation [155,156,161,162].

SUMOylation is not only essential for cardiac development, predominantly by regulating transcription factors, but also implicated in the onset of cardiac diseases [163-165]. Several K<sup>+</sup> channels found in the heart can be modulated by SUMO, such as K<sub>v</sub>2.1 [11,12], a channel that helps set the cell resting potential [166]; K<sub>v</sub>1.5 [10], which controls excitability of atrial cells [167]; and K2P1 [3,6-9], which helps set resting membrane potential. SUMOylation also regulates the cardiac non-selective cationic channel TRPM4, which is localized predominantly in human atrial myocardium, and can act as a Ca<sup>2+</sup> regulator [15,168]. Progressive familial heart block type I, an autosomal dominant disease, has been linked to a mutation in the TRPM4 amino-terminal region that leads to increased TRPM4 SUMOylation and prevention of its ubiquitination and consequent proteasomal degradation [15]. Other proteins crucial for

**Table 1 Potential functional consequences of SUMOylation in Ca<sup>2+</sup> signalling**

| Target (direct or indirect)            | SUMO isoform    | Modified lysine    | Mechanism or Ca <sup>2+</sup> channel type             | Proposed SUMOylation effect                                       | Reference |
|----------------------------------------|-----------------|--------------------|--------------------------------------------------------|-------------------------------------------------------------------|-----------|
| Ca <sub>v</sub> 2.1 subunit (indirect) | SUMO-1          | Unknown            | Inhibition of P/Q-type Ca <sup>2+</sup> channels       | Role in SCA6 pathogenesis                                         | [124]     |
| CAMKII (indirect)                      | SUMO-1          | Unknown            | –                                                      | Differentiation of <i>Drosophila</i> 's nervous system            | [141]     |
| CRMP2 (direct)                         | SUMO-1 SUMO-2/3 | K374               | Inhibition of N-type Ca <sup>2+</sup> channels         | Reduces Ca <sup>2+</sup> influx in sensory neurons                | [128]     |
| MEF2 (direct)                          | SUMO-1          | K403               | –                                                      | Promotes dendritic claw differentiation                           | [145,147] |
| NCX3 (direct)                          | SUMO-1          | K590               | –                                                      | Inhibits NCX3 degradation                                         | [85]      |
| NFAT (indirect)                        | SUMO-2          | Unknown            | –                                                      | Activates pro-hypertrophic genes                                  | [173]     |
| RIM1 $\alpha$ (direct)                 | SUMO-1          | K502               | Increase in P/Q-type Ca <sup>2+</sup> channel activity | Promotes synaptic vesicles release                                | [133]     |
| SERCA2a (direct)                       | SUMO-1          | K480 and K585      | –                                                      | Increases Ca <sup>2+</sup> reuptake to sarcoendoplasmic reticulum | [156,177] |
| Synapsin Ia (direct)                   | SUMO-1          | K687               | –                                                      | Sets up releasable synaptic vesicles                              | [138]     |
| Synaptotagmin-1 (indirect)             | SUMO-1          | Unknown            | –                                                      | Impairs neurotransmitter release                                  | [139]     |
| Syntaxin 1A (direct)                   | SUMO-1          | K252, K253 or K256 | –                                                      | Increases vesicular endocytosis                                   | [137]     |

Abbreviations: CAMKII, Ca<sup>2+</sup>/calmodulin-dependent protein kinase II; CRMP2, collapsin response mediator protein 2; MEF2, myocyte enhancer factor 2; NCX3, isoform 3 of the Na<sup>+</sup>/Ca<sup>2+</sup> exchanger; NFAT, N-terminal serine residues of the nuclear factor of activated T-cells; RIM1 $\alpha$ , Rab3a-interacting molecule 1 $\alpha$ ; SERCA2a, isoform 2a of sarcoendoplasmic reticulum Ca<sup>2+</sup> ATPase.

the maintenance of cardiomyocyte physiology, such as lamin A that plays a structural and functional role in the nucleus, are also reported to be SUMOylated [169,170]. Familial cardiomyopathy has been linked with mutations in the human laminin A gene, which were in turn associated with decreases in laminin A SUMOylation and accelerated cell death [169].

Disrupting Ca<sup>2+</sup> dynamics by interfering with other proteins or transcriptional factors that maintain Ca<sup>2+</sup> homeostasis, such as some of TRP protein Ca<sup>2+</sup> entry channels or N-terminal serine residues of the nuclear factor of activated T cells (NFAT), can contribute to the onset of cardiac dysfunctions [171]. Increased intracellular Ca<sup>2+</sup> levels activate calcineurin, a Ca<sup>2+</sup>-calmodulin dependent serine–threonine protein phosphatase that dephosphorylates NFATs, leading to nuclear translocation of NFATs and activation of pro-hypertrophic genes [172]. SUMO-2 can activate calcineurin-NFAT signalling in cardiomyocytes leading to a hypertrophic phenotype, both *in vitro* and *in vivo* [173]. Unexpectedly, a conjugation-deficient SUMO-2 mutant (SUMO-2 $\Delta$ GG) was equally capable to activate the pathway and promote hypertrophic effects, suggesting a SUMOylation-independent mechanism.

Proteins such as sarcoendoplasmic reticulum calcium ATPase (SERCA) in the sarcoplasmic reticulum and NCX in the cardiomyocyte membrane help to restore Ca<sup>2+</sup> concentrations at baseline following contraction [174]. The reduced expression or activity of SERCA2a is a hallmark of heart failure [175]. A proteomic screen has identified SERCA2a as a target for SUMO-1 (but not SUMO-2/3) at lysines 480 and 585 [156]. SUMO-1 and SERCA2a protein levels were decreased in animal models of heart failure, as well as in human cardiomyocytes isolated from failing ventricles. SUMO-1 overexpression restored SERCA2a levels, whereas either SUMO-1 or SERCA2a overexpression improved Ca<sup>2+</sup> handling, improving cardiac function. However, increased global SUMOylation in SERCA2a knockdown cardiomyocytes did not prevent contractile dysfunction, further confirming that SUMOylated SERCA2a is essential for cardiac function [156]. The small molecule N106 (*N*-(4-methoxybenzo[d]thiazol-2-yl)-5-(4-methoxyphenyl)-1,3,4-oxadiazol-2-amine) was identified using an  $\alpha$ -screen assay that detects SUMO-1 conjugation to nuclear RanGAP1 (the first and one of the most stable SUMO targets identified so far [176]). N106 promoted SERCA2a SUMOylation, resulting in enhanced contractility both in cultured cardiomyocytes and *in vivo*, significantly improving ventricular function in mice with heart failure [177]. N106 was proposed to directly activate the SUMO-activating enzyme [177].

## Concluding remarks

Both alterations in  $\text{Ca}^{2+}$  homeostasis and protein SUMOylation may lead to severe neurological, and also, cardiac pathologies. For example, SUMOylation of proteins involved in  $\text{Ca}^{2+}$  signalling can modulate synapse formation and alter neurotransmitter release. Furthermore, SUMOylation of proteins can modulate  $\text{Ca}^{2+}$  reuptake in cardiomyocytes and thus affect contractility. As described above and summarized in Table 1, it is clear that a wide range of proteins involved in these key physiological processes are subject to, potentially temporal, post-translational modification by different SUMO isoforms. Thus, at the presynapse, proteins involved in  $\text{Ca}^{2+}$  homeostasis, including VGCCs and their proteome, are emerging as SUMO targets; equally, synaptic proteins involved in exocytosis and endocytosis are known to be SUMOylated. Postsynaptic receptor SUMOylation can also impact synaptic function. There is clear potential to exploit this knowledge to improve synaptic function in neurodegenerative and hyperexcitability disorders and to improve cardiac function. Thus, understanding how SUMOylation affects  $\text{Ca}^{2+}$  signalling in physiological and pathophysiological conditions is key to novel therapeutic strategies to prevent and/or cure important human diseases.

## Acknowledgements

Royal Society Newton Advanced and CNPq Fellowships together with IBRO and ISN/CAEN Return Home Awards to H.C. supported this work. L.C.S. is recipient of a CAPES MSc Studentship.

## Competing Interests

The authors declare that there are no competing interests associated with the manuscript.

## Abbreviations

A $\beta$ , amyloid  $\beta$ ; AD, Alzheimer's disease; APP, amyloid precursor protein; CNS, central nervous system; CRMP2, collapsin response mediator protein 2; Desi, deSUMOylating isopeptidase; DJ-1, PD (autosomal recessive, early onset) 7; DmSUMO-1, *Drosophila* SUMO-1; Drp1, dynamin-related protein 1; MEF2A, myocyte enhancer factor 2A; NCX, sodium/calcium exchanger; NFAT, N-terminal serine residues of the nuclear factor of activated T cells; PD, Parkinson's disease; PPAR, peroxisome proliferator-activated receptor; PPF, paired pulse facilitation; RIM, Rab3a-interacting molecule; SCA, spinocerebellar ataxia; SERCA, sarcoplasmic reticulum calcium ATPase; SIM, SUMO interacting motif; SNARE, soluble N-ethylmaleimide sensitive factor attachment protein receptors; SUMO, small ubiquitin-like modifier; TRP, transient receptor potential; TRPM4, transient receptor potential cation channel subfamily M member 4; Ubc9, ubiquitin-like conjugating enzyme 9; USPL1, ubiquitin-specific peptidase-like protein 1; VGCC, voltage-gated calcium channel.

## References

- Hay, R.T. (2005) SUMO: a history of modification. *Mol. Cell.* **18**, 1–12
- Nacerddine, K., Lehembre, F., Bhaumik, M., Artus, J., Cohen-Tannoudji, M., Babinet, C. et al. (2005) The SUMO pathway is essential for nuclear integrity and chromosome segregation in mice. *Dev. Cell* **9**, 769–779
- Plant, L.D., Dementieva, I.S., Kollwe, A., Olikara, S., Marks, J.D. and Goldstein, S.A. (2010) One SUMO is sufficient to silence the dimeric potassium channel K2P1. *Proc. Natl Acad. Sci. U.S.A.* **107**, 10743–10748
- Silveirinha, V., Stephens, G.J. and Cimarosti, H. (2013) Molecular targets underlying SUMO-mediated neuroprotection in brain ischemia. *J. Neurochem.* **127**, 580–591
- Doyle, D.A., Morais-Cabral, J., Pfuetzner, R.A., Kuo, A., Gulbis, J.M., Cohen, S.L. et al. (1998) The structure of the potassium channel: molecular basis of K<sup>+</sup> conduction and selectivity. *Science* **280**, 69–77
- Rajan, S., Plant, L.D., Rabin, M.L., Butler, M. H. and Goldstein, S.A. (2005) Sumoylation silences the plasma membrane leak K<sup>+</sup> channel K2P1. *Cell* **121**, 37–47
- Feliciangeli, S., Bendahhou, S., Sandoz, G., Gounon, P., Reichold, M., Warth, R. et al. (2007) Does sumoylation control K2P1/TWIK1 background K<sup>+</sup> channels? *Cell* **130**, 563–569
- Es-Salah-Lamoureux, Z., Steele, D.F. and Fedida, D. (2010) Research into the therapeutic roles of two-pore-domain potassium channels. *Trends Pharmacol. Sci.* **31**, 587–595
- Plant, L.D., Zuniga, L., Araki, D., Marks, J.D. and Goldstein, S.A. (2012) SUMOylation silences heterodimeric TASK potassium channels containing K2P1 subunits in cerebellar granule neurons. *Sci. Signal.* **5**, ra84
- Benson, M.D., Li, Q.J., Kieckhafer, K., Dudek, D., Whorton, M.R., Sunahara, R.K. et al. (2007) SUMO modification regulates inactivation of the voltage-gated potassium channel K<sub>v</sub>1.5. *Proc. Natl Acad. Sci. U.S.A.* **104**, 1805–1810
- Dai, X.Q., Kolic, J., Marchi, P., Sipione, S. and Macdonald, P.E. (2009) SUMOylation regulates K<sub>v</sub>2.1 and modulates pancreatic beta-cell excitability. *J. Cell Sci.* **122**, 775–779
- Plant, L.D., Dowdell, E.J., Dementieva, I.S., Marks, J.D. and Goldstein, S.A. (2011) SUMO modification of cell surface K<sub>v</sub>2.1 potassium channels regulates the activity of rat hippocampal neurons. *J. Gen. Physiol.* **137**, 441–454



- 13 Qi, Y., Wang, J., Bomben, V.C., Li, D.P., Chen, S.-R., Sun, H. et al. (2014) Hyper-SUMOylation of the  $K_v7$  potassium channel diminishes the M-current leading to seizures and sudden death. *Neuron* **83**, 1159–1171
- 14 Dai, X.Q., Spigelman, A.F., Khan, S., Braun, M., Manning-Fox, J.E. and Macdonald, P.E. (2014) SUMO1 enhances cAMP-dependent exocytosis and glucagon secretion from pancreatic  $\alpha$ -cells. *J. Physiol.* **592**, 3715–3726
- 15 Kruse, M., Schulze-Bahr, E., Corfield, V., Beckmann, A., Stallmeyer, B., Kurtbay, G. et al. (2009) Impaired endocytosis of the ion channel TRPM4 is associated with human progressive familial heart block type I. *J. Clin. Invest.* **119**, 2737–274
- 16 Walsh, C.T., Garneau-Tsodikova, S. and Gatto, Jr, G.J. (2005) Protein posttranslational modifications: the chemistry of proteome diversifications. *Angew. Chem. Int. Ed. Engl.* **45**, 7342–7372
- 17 Henley, J.M., Craig, T.J. and Wilkinson, K.A. (2014) Neuronal SUMOylation: mechanisms, physiology, and roles in neuronal dysfunction. *Physiol. Rev.* **94**, 1249–1258
- 18 Hendriks, I.A., D'Souza, R.C.J., Yang, B., Verlaan-de Vries, M., Mann, M. and Vertegaal, A.C.O. (2014) Uncovering Global SUMOylation Signaling Networks in a Site-Specific Manner. *Nat. Struct. Mol. Biol.* **10**, 927–936
- 19 Hendriks, I.A. and Vertegaal, A.C.O. (2016) A comprehensive compilation of SUMO proteomics. *Nat. Rev. Mol. Cell Biol.* **17**, 581–595
- 20 Johnson, E.S. (2004) Protein modification by SUMO. *Annu. Rev. Biochem.* **73**, 355–382
- 21 Wang, Y. and Dasso, M. (2009) SUMOylation and deSUMOylation at a glance. *J. Cell Sci.* **122**, 4249–4252
- 22 Sampson, D.A., Wang, M. and Matunis, M.J. (2001) The small ubiquitin-like modifier-1 (SUMO-1) consensus sequence mediates Ubc9 binding and is essential for SUMO-1 modification. *J. Biol. Chem.* **276**, 21664–21669
- 23 Sozen, S., Horozoglu, C., Bireller, E.S., Karaali, Z. and Cakmakoglu, B. (2014) Association of SUMO4 M55V and -94ins/del gene variants with type-2 diabetes. *In Vivo* **28**, 919–923
- 24 Sinha, N., Yadav, A.K., Kumar, V., Dutta, P., Bhansali, A. and Jha, V. (2016) SUMO4 163 G>A variation is associated with kidney disease in Indian subjects with type 2 diabetes. *Mol. Biol. Rep.* **43**, 345–348
- 25 Liang, Y.C., Lee, C.C., Yao, Y.L., Lai, C.C., Schmitz, M.L. and Yang, W.M. (2016) SUMO5, a novel poly-SUMO isoform, regulates PML nuclear bodies. *Sci. Rep.* **6**, 26509
- 26 Rodriguez, M.S., Dargemont, C. and Hay, R.T. (2001) SUMO-1 conjugation in vivo requires both a consensus modification motif and nuclear targeting. *J. Biol. Chem.* **276**, 12654–12659
- 27 Jardin, C., Anselm, H.C. and Sticht, H. (2015) Binding properties of SUMO-interacting motifs (SIMs) in yeast. *J. Mol. Model.* **21**, 50
- 28 Flotho, A. and Melchior, F. (2013) Sumoylation: a regulatory protein modification in health and disease. *Annu. Rev. Biochem.* **82**, 357–385
- 29 Gareau, J.R. and Lima, C.D. (2010) The SUMO pathway: emerging mechanisms that shape specificity, conjugation and recognition. *Nat. Rev. Mol. Cell Biol.* **11**, 861–871
- 30 Nayak, A. and Müller, S. (2014) SUMO-specific proteases/isopeptidases: SENPs and beyond. *Genome Biol.* **15**, 422
- 31 Hickey, C.M., Wilson, N.R. and Hochstrasser, M. (2012) Function and regulation of SUMO proteases. *Nat. Rev. Mol. Cell Biol.* **13**, 755–766
- 32 Gong, L., Millas, S., Maul, G.G. and Yeh, E.T. (2000) Differential regulation of sumoylated proteins by a novel sumoylation-specific protease. *J. Biol. Chem.* **275**, 3355–3359
- 33 Martin, S., Nishimune, A., Mellor, J.R. and Henley, J.M. (2007) SUMOylation regulates kainate-receptor-mediated synaptic transmission. *Nature* **447**, 321–325
- 34 Loriol, C., Parisot, J., Poupon, G., Gwizdek, C. and Martin, S. (2012) Developmental regulation and spatiotemporal redistribution of the sumoylation machinery in the rat central nervous system. *PLoS One* **7**, e33757
- 35 Loriol, C., Khayachi, A., Poupon, G., Gwizdek, C. and Martin, S. (2013) Activity-dependent regulation of the sumoylation machinery in rat hippocampal neurons. *Biol. Cell* **105**, 30–45
- 36 Xu, Z. and Au, S.W. (2005) Mapping residues of SUMO precursors essential in differential maturation by SUMO-specific protease, SENP1. *Biochem. J.* **386**, 325–330
- 37 Gong, L. and Yeh, E.T. (2006) Characterization of a family of nucleolar SUMO-specific proteases with preference for SUMO-2 or SUMO-3. *J. Biol. Chem.* **281**, 15869–15877
- 38 Kolli, N., Mikolajczyk, J., Drag, M., Mukhopadhyay, D., Moffatt, N., Dasso, M. et al. (2010) Distribution and paralogue specificity of mammalian deSUMOylating enzymes. *Biochem. J.* **430**, 335–344
- 39 Hang, J. and Dasso, M. (2002) Association of the human SUMO-1 protease SENP2 with the nuclear pore. *J. Biol. Chem.* **277**, 19961–19966
- 40 Reverter, D. and Lima, C.D. (2004) A basis for SUMO protease specificity provided by analysis of human Senp2 and a Senp2-SUMO complex. *Structure* **12**, 1519–1531
- 41 Guo, C., Hildick, K.L., Luo, J., Dearden, L., Wilkinson, K.A. and Henley, J.M. (2013) SENP3-mediated deSUMOylation of dynamin-related protein 1 promotes cell death following ischaemia. *EMBO J.* **32**, 1514–1528
- 42 Zunino, R., Schauss, A., Rippstein, P., Andrade-Navarro, M. and McBride, H.M. (2007) The SUMO protease SENP5 is required to maintain mitochondrial morphology and function. *J. Cell Sci.* **120**, 1178–1188
- 43 Di-Bacco, A., Ouyang, J., Lee, H.Y., Catic, A., Ploegh, H. and Gill, G. (2006) The SUMO-specific protease SENP5 is required for cell division. *Mol. Cell Biol.* **26**, 4489–4498
- 44 Shen, L.N., Geoffroy, M.C., Jaffray, E.G. and Hay, R.T. (2009) Characterization of SENP7, a SUMO-2/3-specific isopeptidase. *Biochem. J.* **421**, 223–230
- 45 Lima, C.D. and Reverter, D. (2008) Structure of the human SENP7 catalytic domain and poly-SUMO deconjugation activities for SENP6 and SENP7. *J. Biol. Chem.* **283**, 32045–32055
- 46 Anderson, D.B., Zanella, C.A., Henley, J.M. and Cimarosti, H. (2017) Sumoylation: implications for neurodegenerative diseases. *Adv. Exp. Med. Biol.* **963**, 261–281

- 47 Dorval, V. and Fraser, P.E. (2006) Small ubiquitin-like modifier (SUMO) modification of natively unfolded proteins tau and alpha-synuclein. *J. Biol. Chem.* **281**, 9919–9924
- 48 Zhang, Y.Q. and Sarge, K.D. (2008) Sumoylation of amyloid precursor protein negatively regulates Abeta aggregate levels. *Biochem. Biophys. Res. Commun.* **374**, 673–678
- 49 Geoffroy, M.C. and Hay, R.T. (2009) An additional role for SUMO in ubiquitin-mediated proteolysis. *Nat. Rev. Mol. Cell Biol.* **10**, 564–568
- 50 Haass, C. and Selkoe, D.J. (2007) Soluble protein oligomers in neurodegeneration: lessons from the Alzheimer's amyloid  $\beta$ -peptide. *Nat. Rev. Mol. Cell Biol.* **8**, 101–112
- 51 Thornton, E., Vink, R., Blumbergs, P.C. and Heuvel, C.V.D. (2006) Soluble amyloid precursor protein a reduces neuronal injury and improves functional outcome following diffuse traumatic brain injury in rats. *Brain Res.* **1094**, 38–46
- 52 Harris, M.E., Wang, Y., Pedigo, Jr, N.W., Hensley, K., Butterfield, D.A. and Carney, J.M. (1996) Amyloid  $\beta$  peptide (25–35) inhibits  $\text{Na}^+$ -dependent glutamate uptake in rat hippocampal astrocyte cultures. *J. Neurochem.* **67**, 277–286
- 53 Li, Y., Wang, H., Wang, S., Quon, D., Liu, Y.W. and Cordell, B. (2003) Positive and negative regulation of APP amyloidogenesis by sumoylation. *Proc. Natl. Acad. Sci. U.S.A.* **100**, 259–264
- 54 Dorval, V., Mazzella, M.J., Mathews, P.M., Hay, R.T. and Fraser, P.E. (2007) Modulation of Abeta generation by small ubiquitin-like modifiers does not require conjugation to target proteins. *Biochem. J.* **404**, 309–316
- 55 Yun, S.M., Cho, S.J., Song, J.C., Song, S.Y., Jo, S.A., Jo, C. et al. (2013) SUMO1 modulates Abeta generation via BACE1 accumulation. *Neurobiol. Aging* **34**, 650–662
- 56 Weingarten, M.D., Lockwood, A.H., Hwo, S.Y. and Kirschner, M.W. (1975) A protein factor essential for microtubule assembly. *Proc. Natl. Acad. Sci. U.S.A.* **72**, 1858–1862
- 57 Selkoe, D. (2001) Alzheimer's disease: genes, proteins, and therapy. *Physiol. Rev.* **81**, 741–766
- 58 Cho, S.J., Yun, S.M., Lee, D.H., Jo, C., Ho-Park, M., Han, C. et al. (2015) Plasma SUMO-1 protein is elevated in Alzheimer's disease. *J. Alzheimers Dis.* **47**, 639–643
- 59 Lee, L., Dale, E., Staniszewski, A., Zhang, H., Saeed, F., Sakurai, M. et al. (2014) Regulation of synaptic plasticity and cognition by SUMO in normal physiology and Alzheimer's disease. *Sci. Rep.* **4**, 7190
- 60 McMillan, L.E., Brown, J.T., Henley, J.M. and Cimarosti, H. (2011) Profiles of SUMO and ubiquitin conjugation in an Alzheimer's disease model. *Neurosci. Lett.* **502**, 201–208
- 61 Nistico, R., Ferraina, C., Marconi, V., Blandini, F., Negri, L., Egebjerg, J. et al. (2014) Age-related changes of protein SUMOylation balance in the AbetaPP Tg2576 mouse model of Alzheimer's disease. *Front. Pharmacol.* **5**, 63
- 62 Binda, C.S., Heimann, M.J., Duda, J.K., Muller, M., Henley, J.M. and Wilkinson, K.A. (2017) Analysis of protein SUMOylation and SUMO pathway enzyme levels in Alzheimer's disease and Down's syndrome. *Opera Med. Phys.* **3**, 19–24
- 63 Eckermann, K. (2013) SUMO and Parkinson's disease. *Neuromolecular Med.* **15**, 737–759
- 64 Guerra de Souza, A.C., Prediger, R.D. and Cimarosti, H. (2016) SUMO-regulated mitochondrial function in Parkinson's disease. *J. Neurochem.* **137**, 673–686
- 65 Maroteaux, L., Campanelli, J.T. and Scheller, R.H. (1988) Synuclein: a neuron-specific protein localized to the nucleus and presynaptic nerve terminal. *J. Neurosci.* **8**, 2804–2815
- 66 Golbe, L.I., Iorio, G., Di-Bonavita, V., Miller, D.C. and Duvoisin, R.C. (1990) A large kindred with autosomal dominant Parkinson's disease. *Ann. Neurol.* **27**, 276–282
- 67 Chandra, S., Fornai, F., Kwon, H.B., Yazdani, U., Atasoy, D., Liu, X. et al. (2004) Double-knockout mice for alpha- and beta-synucleins: effect on synaptic functions. *Proc. Natl. Acad. Sci. U.S.A.* **101**, 14966–14971
- 68 Chandra, S., Gallardo, G., Fernandez-Chacon, R., Schluter, O.M. and Sudhof, T.C. (2005) Alpha-synuclein cooperates with CSPalpha in preventing neurodegeneration. *Cell* **123**, 383–396
- 69 Oh, Y., Kim, Y.M., Mouradian, M.M. and Chung, K.C. (2011) Human polycomb protein 2 promotes alpha-synuclein aggregate formation through covalent SUMOylation. *Brain Res.* **1381**, 78–89
- 70 Wong, M.J.L., Cook, A.L., Mackay-Sim, A. and Poutney, D.L. (2012) Differential SUMO-1 distribution in Parkinson's disease patient neurosphere-derived cells in response to proteolytic stress (Abstract). *Proteostasis and Disease Symposium*
- 71 Wong, M.B., Goodwin, J., Norazit, A., Meedeniya, A.C., Richter-Landsberg, C., Gai, W.P. et al. (2013) SUMO-1 is associated with a subset of lysosomes in glial protein aggregate diseases. *Neurotox. Res.* **23**, 1–21
- 72 Um, J.W. and Chung, K.C. (2006) Functional modulation of parkin through physical interaction with SUMO-1. *J. Neurosci. Res.* **84**, 1543–1554
- 73 Bonifati, V., Rizzu, P., van-Baren, M.J., Schaap, O., Breedveld, G.J., Krieger, E. et al. (2003) Mutations in the DJ-1 gene associated with autosomal recessive early-onset parkinsonism. *Science* **299**, 256–259
- 74 Taira, T., Saito, Y., Niki, T., Iguchi-Arigo, S.M., Takahashi, K. and Ariga, H. (2004) DJ-1 has a role in antioxidative stress to prevent cell death. *EMBO Rep.* **5**, 213–218
- 75 Shinbo, Y., Niki, T., Taira, T., Ooe, H., Takahashi-Niki, K., Maita, C. et al. (2006) Proper SUMO-1 conjugation is essential to DJ-1 to exert its full activities. *Cell Death Differ.* **13**, 96–108
- 76 Janer, A., Werner, A., Takahashi-Fujigasaki, J., Daret, A., Fujigasaki, H., Takada, K. et al. (2010) SUMOylation attenuates the aggregation propensity and cellular toxicity of the polyglutamine expanded ataxin-7. *Hum. Mol. Genet.* **19**, 181–195
- 77 Lee, Y.J., Miyake, S., Wakita, H., McMullen, D.C., Azuma, Y., Auh, S. et al. (2007) Protein SUMOylation is massively increased in hibernation torpor and is critical for the cytoprotection provided by ischemic preconditioning and hypothermia in SHSY5Y cells. *J. Cereb. Blood Flow Metab.* **27**, 950–962
- 78 Cimarosti, H., Lindberg, C., Bomholt, S.F., Ronn, L.C. and Henley, J.M. (2008) Increased protein SUMOylation following focal cerebral ischemia. *Neuropharmacology* **54**, 280–289

- 79 Yang, W., Sheng, H., Homi, H.M., Warner, D.S. and Paschen, W. (2008) Cerebral ischemia/stroke and small ubiquitin-like modifier (SUMO) conjugation—a new target for therapeutic intervention? *J. Neurochem.* **106**, 989–999
- 80 Sarge, K.D. and Park-Sarge, O.K. (2011) SUMO and its role in human diseases. *Int. Rev. Cell Mol. Biol.* **288**, 167–183
- 81 Cimarosti, H., Ashikaga, E., Jaafari, N., Dearden, L., Rubin, P., Wilkinson, K. A. et al. (2012) Enhanced SUMOylation and SENP-1 protein levels following oxygen and glucose deprivation in neurones. *J. Cereb. Blood Flow Metab.* **32**, 17–22
- 82 Wilson, T.J., Slupe, A.M. and Strack, S. (2013) Cell signaling and mitochondrial dynamics: Implications for neuronal function and neurodegenerative disease. *Neurobiol. Dis.* **51**, 13–26
- 83 Chang, C.R. and Blackstone, C. (2010) Dynamic regulation of mitochondrial fission through modification of the dynamin-related protein Drp1. *Ann. NY Acad. Sci.* **1201**, 34–39
- 84 Molinaro, P., Cuomo, O., Pignataro, G., Boscia, F., Sirabella, R., Pannaccione, A. et al. (2008) Targeted disruption of Na<sup>+</sup>/Ca<sup>2+</sup> exchanger 3 (NCX3) gene leads to a worsening of ischemic brain damage. *J. Neurosci.* **28**, 1179–1184
- 85 Cuomo, O., Pignataro, G., Sirabella, R., Molinaro, P., Anzilotti, S., Scorziello, A. et al. (2016) SUMOylation of LYS590 of NCX3 f-Loop by SUMO-1 participates in brain neuroprotection induced by ischemic preconditioning. *Stroke* **47**, 1085–1093
- 86 Dutting, E., Schroder-Kress, N., Sticht, H. and Enz, R. (2011) SUMO E3 ligases are expressed in the retina and regulate SUMOylation of the metabotropic glutamate receptor 8b. *Biochem. J.* **435**, 365–371
- 87 Konopacki, F.A., Jaafari, N., Rocca, D.L., Wilkinson, K.A., Chamberlain, S., Rubin, P. et al. (2011) Agonist-induced PKC phosphorylation regulates GluK2 SUMOylation and kainate receptor endocytosis. *Proc. Natl. Acad. Sci. U.S.A.* **108**, 19772–19777
- 88 Caraci, F., Battaglia, G., Sortino, M. A., Spampinato, S., Molinaro, G., Copani, A. et al. (2012) Metabotropic glutamate receptors in neurodegeneration/neuroprotection: Still a hot topic? *Neurochem. Int.* **61**, 559–565
- 89 Zhu, Q.J., Xu, Y., Du, C. P. and Hou, X.Y. (2012) SUMOylation of the kainate receptor subunit GluK2 contributes to the activation of the MLK3-JNK3 pathway following kainate stimulation. *FEBS Lett.* **586**, 1259–1264
- 90 Schorova, L. and Martin, S. (2016) SUMOylation in synaptic function and dysfunction. *Front. Synaptic Neurosci.* **8**, 1–24
- 91 Wheeler, D.B., Randall, A. and Tsien, R.W. (1994) Roles of N-type and Q-type Ca<sup>2+</sup> channels in supporting hippocampal synaptic transmission. *Science* **264**, 107–111
- 92 Tanabe, T., Beam, K.G., Adams, B.A., Niidome, T. and Numa, S. (1990) Regions of the skeletal muscle dihydropyridine receptor critical for excitation-contraction coupling. *Nature* **346**, 567–569
- 93 Dolmetsch, R.E., Pajvani, U., Fife, K., Spotts, J.M. and Greenberg, M.E. (2001) Signaling to the nucleus by an L-type calcium channel-calmodulin complex through the MAP kinase pathway. *Science* **294**, 333–339
- 94 Wheeler, D.G., Groth, R.D., Ma, H., Barret, C.F., Owen, S.F., Safa, P. et al. (2012) Ca<sub>v</sub>1 and Ca<sub>v</sub>2 channels engage distinct modes of Ca<sup>2+</sup> signaling to control CREB dependent gene expression. *Cell* **149**, 1112–1124
- 95 Clapham, D.E. (2007) Calcium signaling. *Cell* **131**, 1047–1058
- 96 Zamponi, G.W. (2016) Targeting voltage-gated calcium channels in neurological and psychiatric diseases. *Nat. Rev.* **15**, 19–34
- 97 Hagiwara, S., Ozawa, S. and Sand, O. (1975) Voltage clamp analysis of two inward current mechanisms in the egg cell membrane of a starfish. *J. Gen. Physiol.* **65**, 617–644
- 98 Bean, B.P. (1989) Classes of calcium channels in vertebrate cells. *Annu. Rev. Physiol.* **51**, 367–384
- 99 Nowycky, M.C., Fox, A.P. and Tsien, R.W. (1985) Three types of neuronal calcium channel with different calcium agonist sensitivity. *Nature* **316**, 440–443
- 100 Zamponi, G.W., Striessnig, J., Koschak, A. and Dolphin, A.C. (2015) The physiology, pathology, and pharmacology of voltage-gated calcium channels and their future therapeutic potential. *Pharmacol. Rev.* **67**, 821–870
- 101 Berridge, M.J. (2014) Ion channels. *Cell Signal. Biol.* 1–74
- 102 Felix, R. (2006) Calcium channelopathies. *Neuromolecular Med.* **8**, 307–318
- 103 Lory, P. and Mezghrani, A. (2010) Calcium channelopathies in inherited neurological disorders: relevance to drug screening for acquired channel disorders. *IDrugs* **13**, 467–471
- 104 Oliveira, A.M., Bading, H. and Mauceri, D. (2014) Dysfunction of neuronal calcium signaling in aging and disease. *Cell Tissue Res.* **2**, 381–383
- 105 Steinlein, O.K. (2014) Calcium signaling and epilepsy. *Cell Tissue Res.* **2**, 385–393
- 106 Schäfer, M.K.E., Pfeiffer, A., Jaeckel, M., Pouya, A., Dolga, A.M. and Methner, A. (2014) Regulators of mitochondrial Ca<sup>2+</sup> homeostasis in cerebral ischemia. *Cell Tissue Res.* **357**, 395–405
- 107 Bourinet, E., Altier, C., Hildebrand, M.E., Trang, T., Salter, M.W. and Zamponi, G.W. (2014) Calcium-permeable ion channels in pain signaling. *Physiol. Rev.* **94**, 81–140
- 108 Waxman, S.G. and Zamponi, G.W. (2014) Regulating excitability of peripheral afferents: emerging ion channel targets. *Nat. Neurosci.* **17**, 153–163
- 109 Miljanich, G.P. (2004) Ziconotide: neuronal calcium channel blocker for treating severe chronic pain. *Curr. Med. Chem.* **11**, 3029–3040
- 110 Rauck, R.L., Wallace, M.S., Burton, A.W., Kapural, L. and North, J.M. (2009) Intrathecal ziconotide for neuropathic pain: a review. *Pain Pract.* **9**, 327–337
- 111 Smith, H.S. and Deer, T.R. (2009) Safety and efficacy of intrathecal ziconotide in the management of severe chronic pain. *Ther. Clin. Risk Manag.* **5**, 521–534
- 112 Cizkova, D., Marsala, J., Lukacova, N., Marsala, M., Jergova, S., Orendacova, J. et al. (2002) Localization of N-type Ca<sup>2+</sup> channels in the rat spinal cord following chronic constrictive nerve injury. *Exp. Brain Res.* **147**, 456–463
- 113 Jagodic, M.M., Pathirathna, S., Joksovic, P.M., Lee, W., Nelson, M.T., Naik, A.K. et al. (2008) Upregulation of the T-type calcium current in small rat sensory neurons after chronic constrictive injury of the sciatic nerve. *J. Neurophysiol.* **99**, 3151–3156

- 114 Marger, F., Gelot, A., Alloui, A., Matricon, J., Ferrer, J.F., Barrère, C. et al. (2011) T-type calcium channels contribute to colonic hypersensitivity in a rat model of irritable bowel syndrome. *Proc. Natl. Acad. Sci. U.S.A.* **108**, 11268–11273
- 115 Bezprozvanny, I. and Mattson, M.P. (2008) Neuronal calcium mishandling and the pathogenesis of Alzheimer's disease. *Trends Neurosci.* **31**, 454–463
- 116 Brawek, B. and Garaschuk, O. (2014) Network-wide dysregulation of calcium homeostasis in Alzheimer's disease. *Cell Tissue Res.* **357**, 427–438
- 117 Mezler, M., Barghorn, S., Schoemaker, H., Gross, G. and Nimrich, V. (2012) A  $\beta$ -amyloid oligomer directly modulates P/Q-type calcium currents in *Xenopus* oocytes. *Br. J. Pharmacol.* **165**, 1572–1583
- 118 Hermann, D., Mezler, M., Müller, M.K., Wicke, K., Gross, G., Draguhn, A. et al. (2013) Synthetic A $\beta$  oligomers (A $\beta$ (1–42) globulomer) modulate presynaptic calcium currents: prevention of A $\beta$ -induced synaptic deficits by calcium channel blockers. *Eur. J. Pharmacol.* **702**, 44–55
- 119 Rush, T. and Buisson, A. (2014) Reciprocal disruption of neuronal signaling and A $\beta$  production mediated by extrasynaptic NMDA receptors: a downward spiral. *Cell Tissue Res.* **356**, 279–286
- 120 Putzier, I., Kullmann, P.H., Horn, J.P. and Levitan, E.S. (2009) Ca $v$ 1.3 channel voltage dependence, not Ca $^{2+}$  selectivity, drives pacemaker activity and amplifies bursts in nigral dopamine neurons. *J. Neurosci.* **29**, 15414–15419
- 121 Surmeier, D.J. and Schumacker, P.T. (2013) Calcium, bioenergetics, and neuronal vulnerability in Parkinson's disease. *J. Biol. Chem.* **288**, 10736–10741
- 122 Rcom-H'cheo-Gauthier, A., Goodwin, J. and Pountney, D.L. (2014) Interactions between calcium and alpha-synuclein in neurodegeneration. *Biomolecules.* **4**, 795–811
- 123 Zhuchenko, O., Bailey, J., Bonnen, P., Ashizawa, T., Stockton, D.W., Amos, C. et al. (1997) Autosomal dominant cerebellar ataxia (SCA6) associated with small polyglutamine expansions in the alpha 1A-voltage-dependent calcium channel. *Nat. Genet.* **15**, 62–69
- 124 Davila, M.A., Chan, H. and Piedras-Renteria, E.S. (2010) SUMOylation of voltage-gated alpha1A calcium channels. *Biophys. J.* **98**, 692a–693a
- 125 Feligioni, M., Nishimune, A. and Henley, J.M. (2009) Protein SUMOylation modulates calcium influx and glutamate release from presynaptic terminals. *Eur. J. Neurosci.* **29**, 1348–1356
- 126 Müller, C.S., Haupt, A., Bildl, W., Schindler, J., Knaus, H.G., Meissner, M. et al. (2010) Quantitative proteomics of the Ca $v$ 2 channel nano-environments in the mammalian brain. *Proc. Natl. Acad. Sci. U.S.A.* **107**, 14950–14957
- 127 Brittain, J.M., Piekarz, A.D., Wang, Y., Kondo, T., Cummins, T.R. and Khanna, R. (2009) An atypical role for collapsin response mediator protein 2 (CRMP-2) in neurotransmitter release via interaction with presynaptic voltage-gated calcium channels. *J. Biol. Chem.* **284**, 31375–31390
- 128 Ju, W., Li, Q., Wilson, S.M., Brittain, J.M., Meroueh, L. and Khanna, R. (2013) SUMOylation alters CRMP2 regulation of calcium influx in sensory neurons. *Channels (Austin)* **7**, 153–159
- 129 Dustrude, E.T., Wilson, S.M., Ju, W., Xiao, Y. and Khanna, R. (2013) CRMP2 protein SUMOylation modulates NaV1.7 channel trafficking. *J. Biol. Chem.* **288**, 24316–24331
- 130 Dib-Hajj, S. D., Yang, Y., Black, J.A. and Waxman, S.G. (2013) The NaV1.7 sodium channel: from molecule to man. *Nat. Rev. Neurosci.* **14**, 49–62
- 131 Deng, L., Kaeser, P.S., Xu, W. and Sudhof, T.C. (2011) RIM proteins activate vesicle priming by reversing autoinhibitory homodimerization of Munc13. *Neuron* **69**, 317–331
- 132 Kaeser, P.S., Deng, L., Wang, Y., Dulubova, I., Liu, X., Rizo, J. et al. (2011) RIM proteins tether Ca $^{2+}$  channels to presynaptic active zones via a direct PDZ-domain interaction. *Cell* **144**, 282–295
- 133 Girach, F., Craig, T.J., Rocca, D.L. and Henley, J.M. (2013) RIM1a SUMOylation is required for fast synaptic vesicle exocytosis. *Cell Rep.* **5**, 1294–1301
- 134 Südhof, T.C. (2013) Neurotransmitter release: the last millisecond in the life of a synaptic vesicle. *Neuron* **80**, 675–690
- 135 Xu, J., Luo, F., Zhang, Z., Xue, L., Wu, X.S., Chiang, H.C. et al. (2013) SNARE proteins synaptobrevin, SNAP-25, and syntaxin are involved in rapid and slow endocytosis at synapses. *Cell Rep.* **3**, 1414–1421
- 136 Zhang, Z., Wang, D., Sun, T., Xu, J., Chiang, H.C., Shin, W. et al. (2013) The SNARE proteins SNAP25 and synaptobrevin are involved in endocytosis at hippocampal synapses. *J. Neurosci.* **33**, 9169–9175
- 137 Craig, T.J., Anderson, D., Evans, A.J., Girach, F. and Henley, J.M. (2015) SUMOylation of syntaxin1A regulates presynaptic endocytosis. *Sci. Rep.* **5**, 17669
- 138 Tang, L.T., Craig, T.J. and Henley, J.M. (2015) SUMOylation of synapsin Ia maintains synaptic vesicle availability and is reduced in an autism mutation. *Nat. Commun.* **6**, 7728
- 139 Matsuzaki, S., Lee, L., Knock, E., Srikumar, T., Sakurai, M., Hazrati, L.N. et al. (2015) SUMO-1 affects synaptic function, spine density and memory. *Sci. Rep.* **5**, 10730
- 140 Lisman, J., Schulman, H. and Cline, H. (2002) The molecular basis of CaMKII function in synaptic and behavioural memory. *Nat. Rev. Neurosci.* **3**, 175–190
- 141 Long, X. and Griffith, L.C. (2000) Identification and characterization of a SUMO-1 conjugation system that modifies neuronal calcium/calmodulin-dependent protein kinase II in *Drosophila melanogaster*. *J. Biol. Chem.* **275**, 40765–40776
- 142 Flavell, S.W., Cowan, C.W., Kim, T.K., Greer, P.L., Lin, Y., Paradis, S. et al. (2006) Activity-dependent regulation of MEF2 transcription factors suppresses excitatory synapse number. *Science* **311**, 1008–1012
- 143 Hietakangas, V., Anckar, J., Blomster, H.A., Fujimoto, M., Palvimo, J.J., Nakai, A. et al. (2006) PDSM, a motif for phosphorylation-dependent SUMO modification. *Proc. Natl. Acad. Sci. U.S.A.* **103**, 45–50
- 144 Kang, J., Gocke, C.B. and Yu, H. (2006) Phosphorylation-facilitated SUMOylation of MEF2C negatively regulates its transcriptional activity. *BMC Biochem.* **7**, 5
- 145 Riquelme, C., Barthel, K.K. and Liu, X. (2006) SUMO-1 modification of MEF2A regulates its transcriptional activity. *J. Cell. Mol. Med.* **10**, 132–144

- 146 Zhao, X., Sternsdorf, T., Bolger, T.A., Evans, R.M. and Yao, T.P. (2005) Regulation of MEF2 by histone deacetylase 4- and SIRT1 deacetylase-mediated lysine modifications. *Mol. Cell. Biol.* **25**, 8456–8464
- 147 Shalizi, A., Gaudillière, B., Yuan, Z., Stegmüller, J., Shirogane, T., Ge, Q. et al. (2006) A calcium-regulated MEF2 SUMOylation switch controls postsynaptic differentiation. *Science* **311**, 1012–1017
- 148 Zündorf, G. and Reiser, G. (2011) Calcium dysregulation and homeostasis of neural calcium in the molecular mechanisms of neurodegenerative diseases provide multiple targets for neuroprotection. *Antioxid. Redox Signal.* **14**, 1275–1288
- 149 Krumova, P., Meulmeester, E., Garrido, M., Tirard, M., Hsiao, H. H., Bossis, G et al. (2011) SUMOylation inhibits  $\alpha$ -synuclein aggregation and toxicity. *J. Cell Biol.* **194**, 49–60
- 150 Abeywardana, T. and Pratt, M.R. (2015) Extent of inhibition of  $\alpha$  synuclein aggregation in vitro by SUMOylation is conjugation site- and SUMO isoform-selective. *Biochem* **54**, 959–961
- 151 Ronzitti, G., Bucci, G., Emanuele, M., Leo, D., Sotnikova, T.D., Mus, L.V. et al. (2014) Exogenous  $\alpha$ -synuclein decreases raft partitioning of Cav2.2 channels inducing dopamine release. *J. Neurosci.* **34**, 10603–10615
- 152 Oh, Y., Kim, Y.M., Mouradian, M.M. and Chung, K.C. (2011) Human polycomb protein 2 promotes  $\alpha$ -synuclein aggregate formation through covalent SUMOylation. *Brain Res.* **1381**, 78–89
- 153 Wang, L., Wansleeben, C., Zhao, S., Miao, P., Paschen, W. and Yang, W. (2014) SUMO-2 is essential while SUMO3 is dispensable for mouse embryonic development. *EMBO Rep.* **15**, 878–885
- 154 Wang, J., Chen, L., Wen, S., Zhu, H., Yu, W., Moskowitz, I.P. et al. (2011) Defective SUMOylation pathway directs congenital heart disease. *Birth Defects Res. A Clin. Mol. Teratol.* **91**, 468–476
- 155 Kim, E.Y., Zhang, Y., Ye, B., Segura, A.M., Beketaev, I., Xi, Y. et al. (2015) Involvement of activated SUMO-2 conjugation in cardiomyopathy. *Biochim. Biophys. Acta* **1852**, 1388–1399
- 156 Kho, C., Lee, A., Jeong, D., Oh, J.G., Chaanine, A.H., Kizana, E. et al. (2011) SUMO-1-dependent modulation of SERCA2a in heart failure. *Nature* **477**, 601–605
- 157 Kim, E.Y., Chen, L., Ma, Y., Yu, W., Chang, J., Moskowitz, I.P. et al. (2012) Enhanced deSUMOylation in murine hearts by overexpressed SENP2 leads to congenital heart defects and cardiac dysfunction. *J. Mol. Cell. Cardiol.* **52**, 638–649
- 158 Mendler, L., Braun, T. and Müller, S. (2016) The ubiquitin-like SUMO system and heart function from development to disease. *Circ. Res.* **118**, 132–144
- 159 Lee, Y.J. and Hallenbeck, J.M. (2013) SUMO and ischemic tolerance. *Neuromol. Med.* **15**, 771–781
- 160 Guo, C. and Henley, J.M. (2014) Wrestling with stress: roles of protein SUMOylation and deSUMOylation in cell stress response. *IUBMB Life* **66**, 71–77
- 161 Gupta, M.K., Gulick, J., Liu, R., Wang, X., Molkentin, J.D. and Robbins, J. (2014) SUMO E2 enzyme UBC9 is required for efficient protein quality control in cardiomyocytes. *Circ. Res.* **115**, 721–729
- 162 Maejima, Y. and Sadoshima, J. (2014) SUMOylation: a novel protein quality control modifier in the heart. *Circ. Res.* **115**, 686–689
- 163 Matsuzaki, K., Minami, T., Tojo, M., Honda, Y., Uchimura, Y., Saitoh, H. et al. (2003) Serum response factor is modulated by the SUMO-1 conjugation system. *Biochem. Biophys. Res. Commun.* **306**, 32–38
- 164 Wang, J., Feng, X.H. and Schwartz, R.J. (2004) SUMO-1 modification activated GATA4-dependent cardiogenic gene activity. *J. Biol. Chem.* **279**, 49091–49098
- 165 Wang, J., Li, A., Wang, Z., Feng, X., Olson, E.N. and Schwartz, R.J. (2007) Myocardin SUMOylation transactivates cardiogenic genes in pluripotent 10T1/2 fibroblasts. *Mol. Cell Biol.* **27**, 622–632
- 166 Pal, S., Hartnett, K.A., Nerbonne, J.M., Levitan, E.S. and Aizenman, E. (2003) Mediation of neuronal apoptosis by  $K_{v}2.1$ -encoded potassium channels. *J. Neurosci.* **23**, 4798–4802
- 167 Stapels, M., Piper, C., Yang, T., Li, M., Stowell, C., Xiong, Z.G. et al. (2010) Polycomb group proteins as epigenetic mediators of neuroprotection in ischemic tolerance. *Sci. Signal.* **3**, ra15
- 168 Rougier, J.S., Albesa, M. and Abrie, I.H. (2010) Ubiquitylation and SUMOylation of cardiac ion channels. *J. Cardiovasc. Pharmacol.* **56**, 22–28
- 169 Zhang, Y.Q. and Sarge, K.D. (2008) SUMOylation regulates lamin A function and is lost in lamin A mutants associated with familial cardiomyopathies. *J. Cell Biol.* **182**, 35–39
- 170 Broers, J.L., Ramaekers, F.C., Bonne, G., Yaou, R.B. and Hutchison, C.J. (2006) Nuclear lamins: laminopathies and their role in premature ageing. *Physiol. Rev.* **86**, 967–1008
- 171 Cartwright, E.J., Mohamed, T., Oceandy, D. and Neyses, L. (2011) Calcium signaling dysfunction in heart disease. *Biofactors* **37**, 175–181
- 172 Wilkins, B.J. and Molkentin, J.D. (2004) Calcium-calcineurin signaling in the regulation of cardiac hypertrophy. *Biochem. Biophys. Res. Commun.* **322**, 1178–1191
- 173 Bernt, A., Rangrez, A.Y., Eden, M., Jungmann, A., Katz, S., Rohr, C. et al. (2016) SUMOylation-independent activation of Calcineurin-NFAT signaling via SUMO-2 mediates cardiomyocyte hypertrophy. *Sci. Rep.* **6**, 35758
- 174 Woodcock, E.A. and Matkovich, S.J. (2005) Cardiomyocytes structure, function and associated pathologies. *Int. J. Biochem. Cell Biol.* **37**, 1746–1751
- 175 Meyer, M., Schillinger, W., Pieske, B., Holubarsch, C., Heilmann, C., Posival, H. et al. (1995) Alterations of sarcoplasmic reticulum proteins in failing human dilated cardiomyopathy. *Circulation* **92**, 778–784
- 176 Melchior, F., Paschal, B., Evans, J. and Gerace, L. (1993) Inhibition of nuclear protein import by nonhydrolyzable analogues of GTP and identification of the small GTPase Ran/TC4 as an essential transport factor. *J. Cell Biol.* **123**, 1649–1659
- 177 Kho, C., Lee, A., Jeong, D., Oh, J.G., Gorski, P.A., Fish, K. et al. (2015) Small-molecule activation of SERCA2a SUMOylation for the treatment of heart failure. *Nat. Commun.* **7229**, 1–11
